# Supplementary material for: Recognition-induced destabilization: controlled release from molecularly imprinted chitosan nanoparticles via specific, non-catalytic enzyme recognition
Source: Royal Society of Chemistry journal article supplement (doi:10.1039/d5ra05081b), 2025-01-01
Supplement: d5ra05081b1.pdf [file d5ra05081b1.pdf]

## **Supplementary Materials**

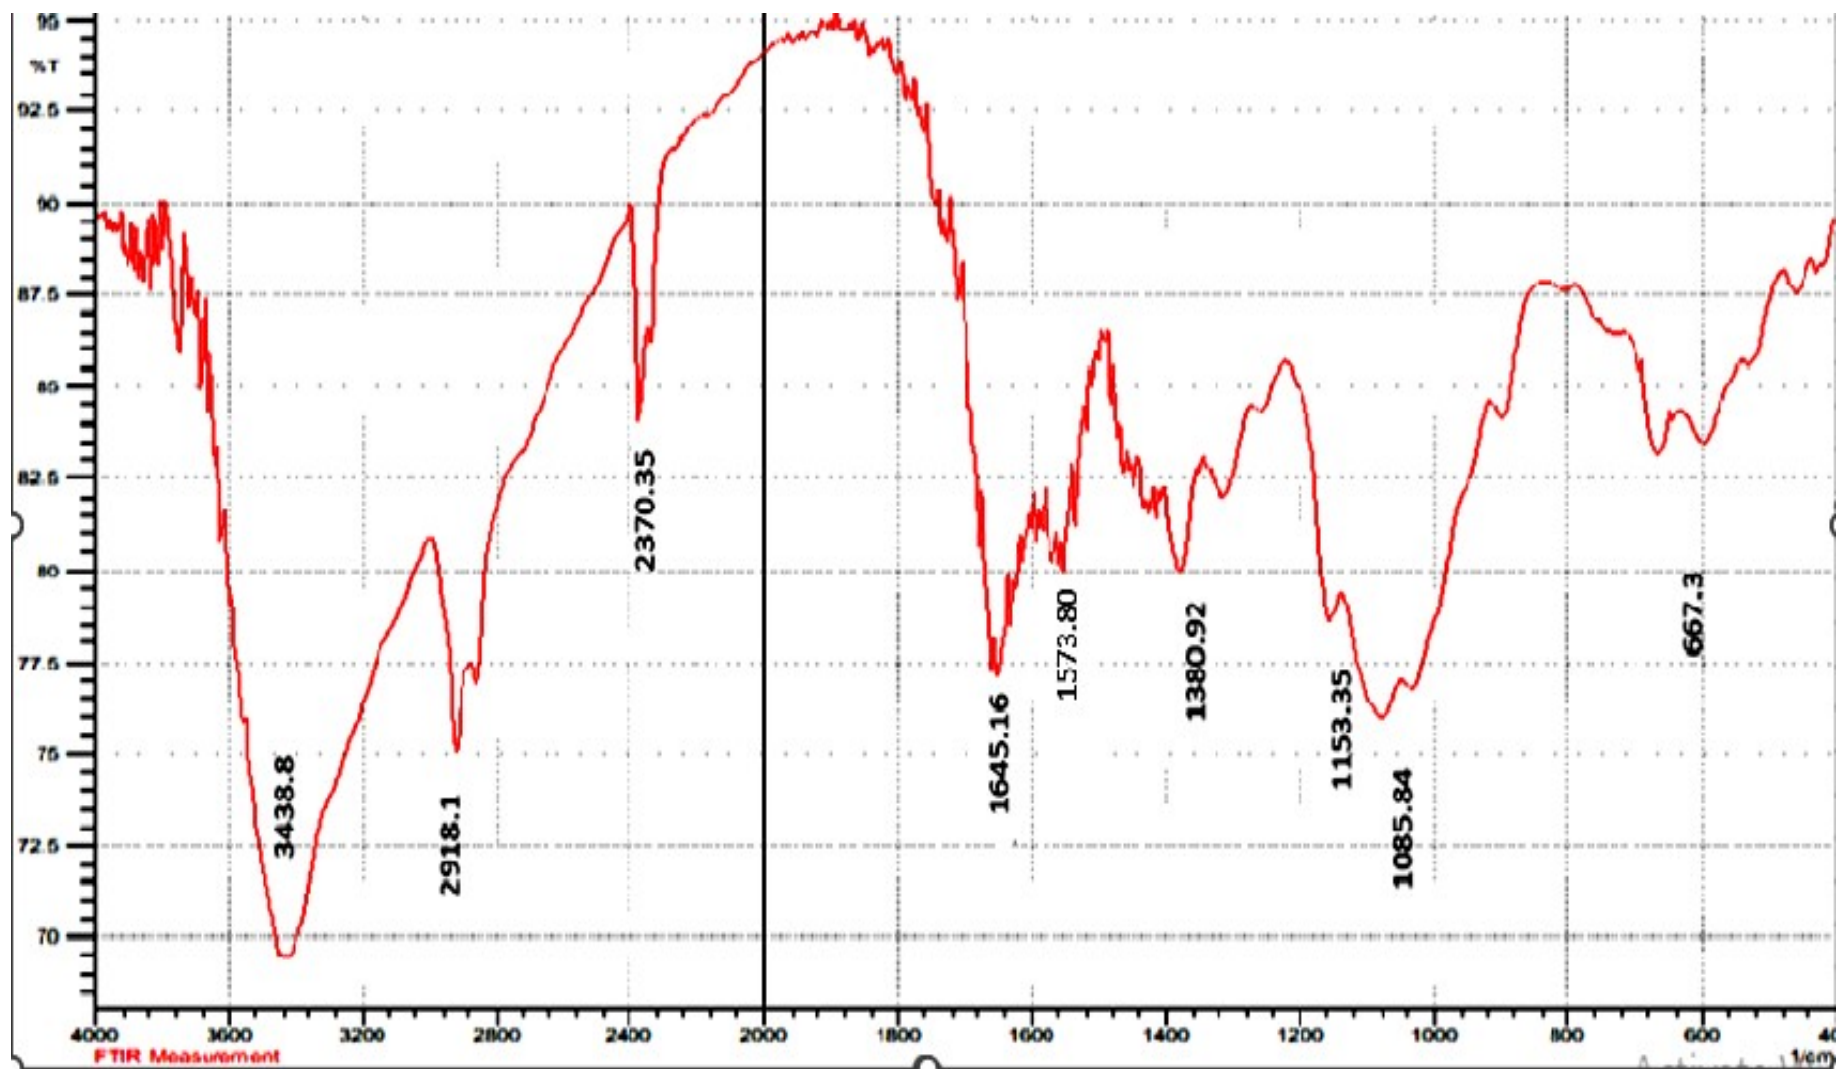

Figure S1: Infrared of Chitosan (C).

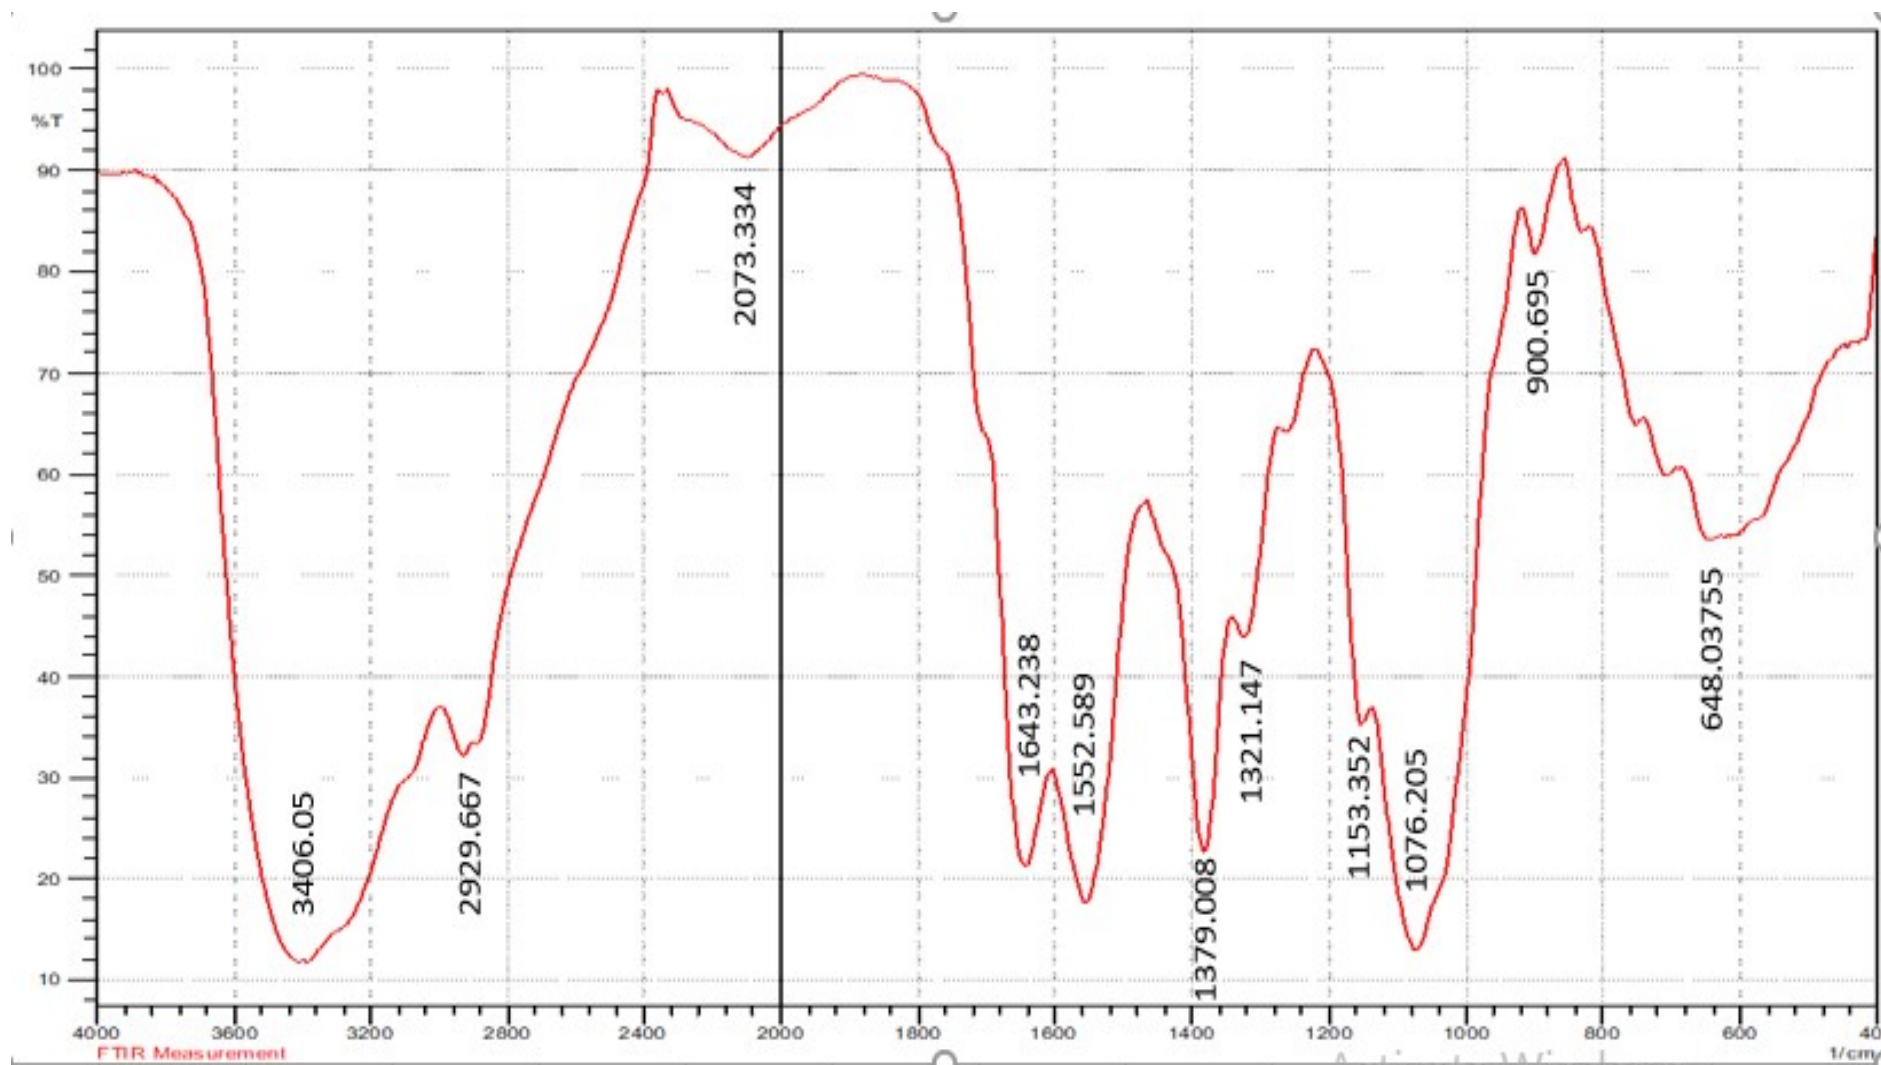

**Figure S2:** Infrared of Chitosan Phthalate (CP).

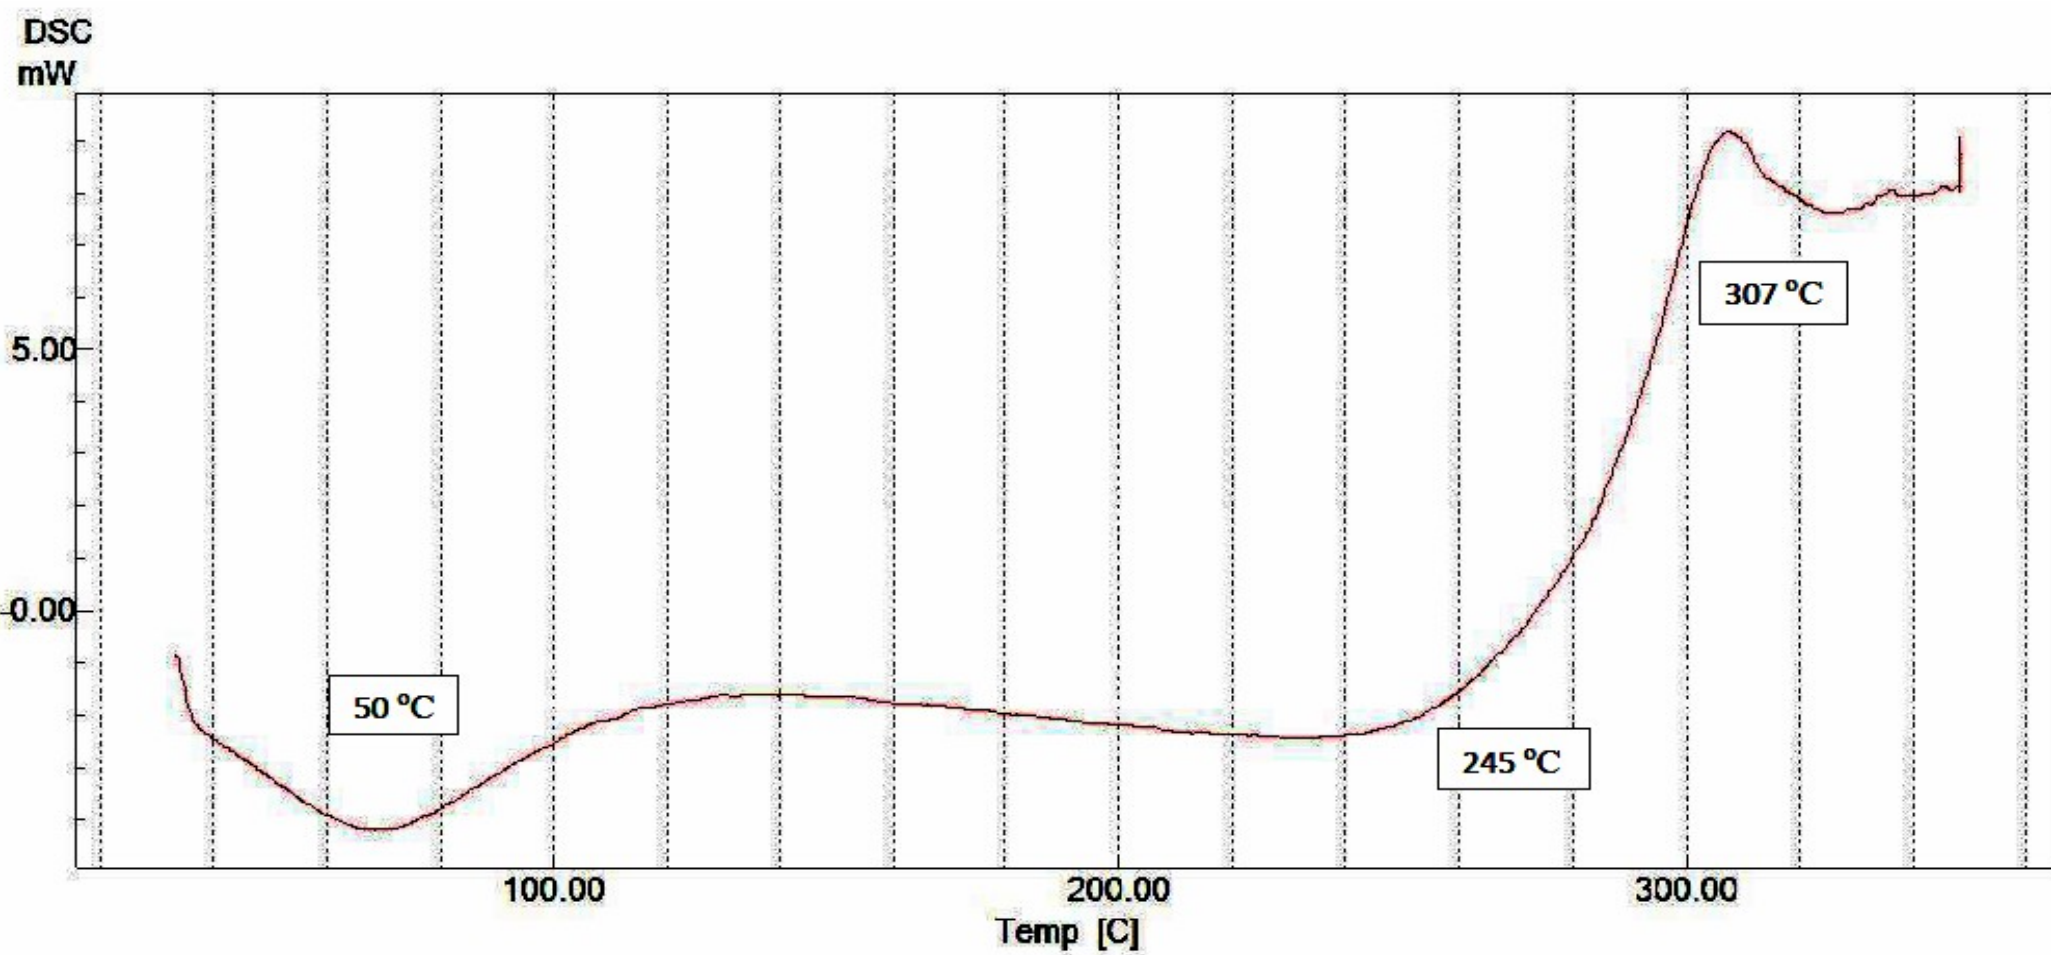

**Figure S3:** DSC of Chitosan (C).

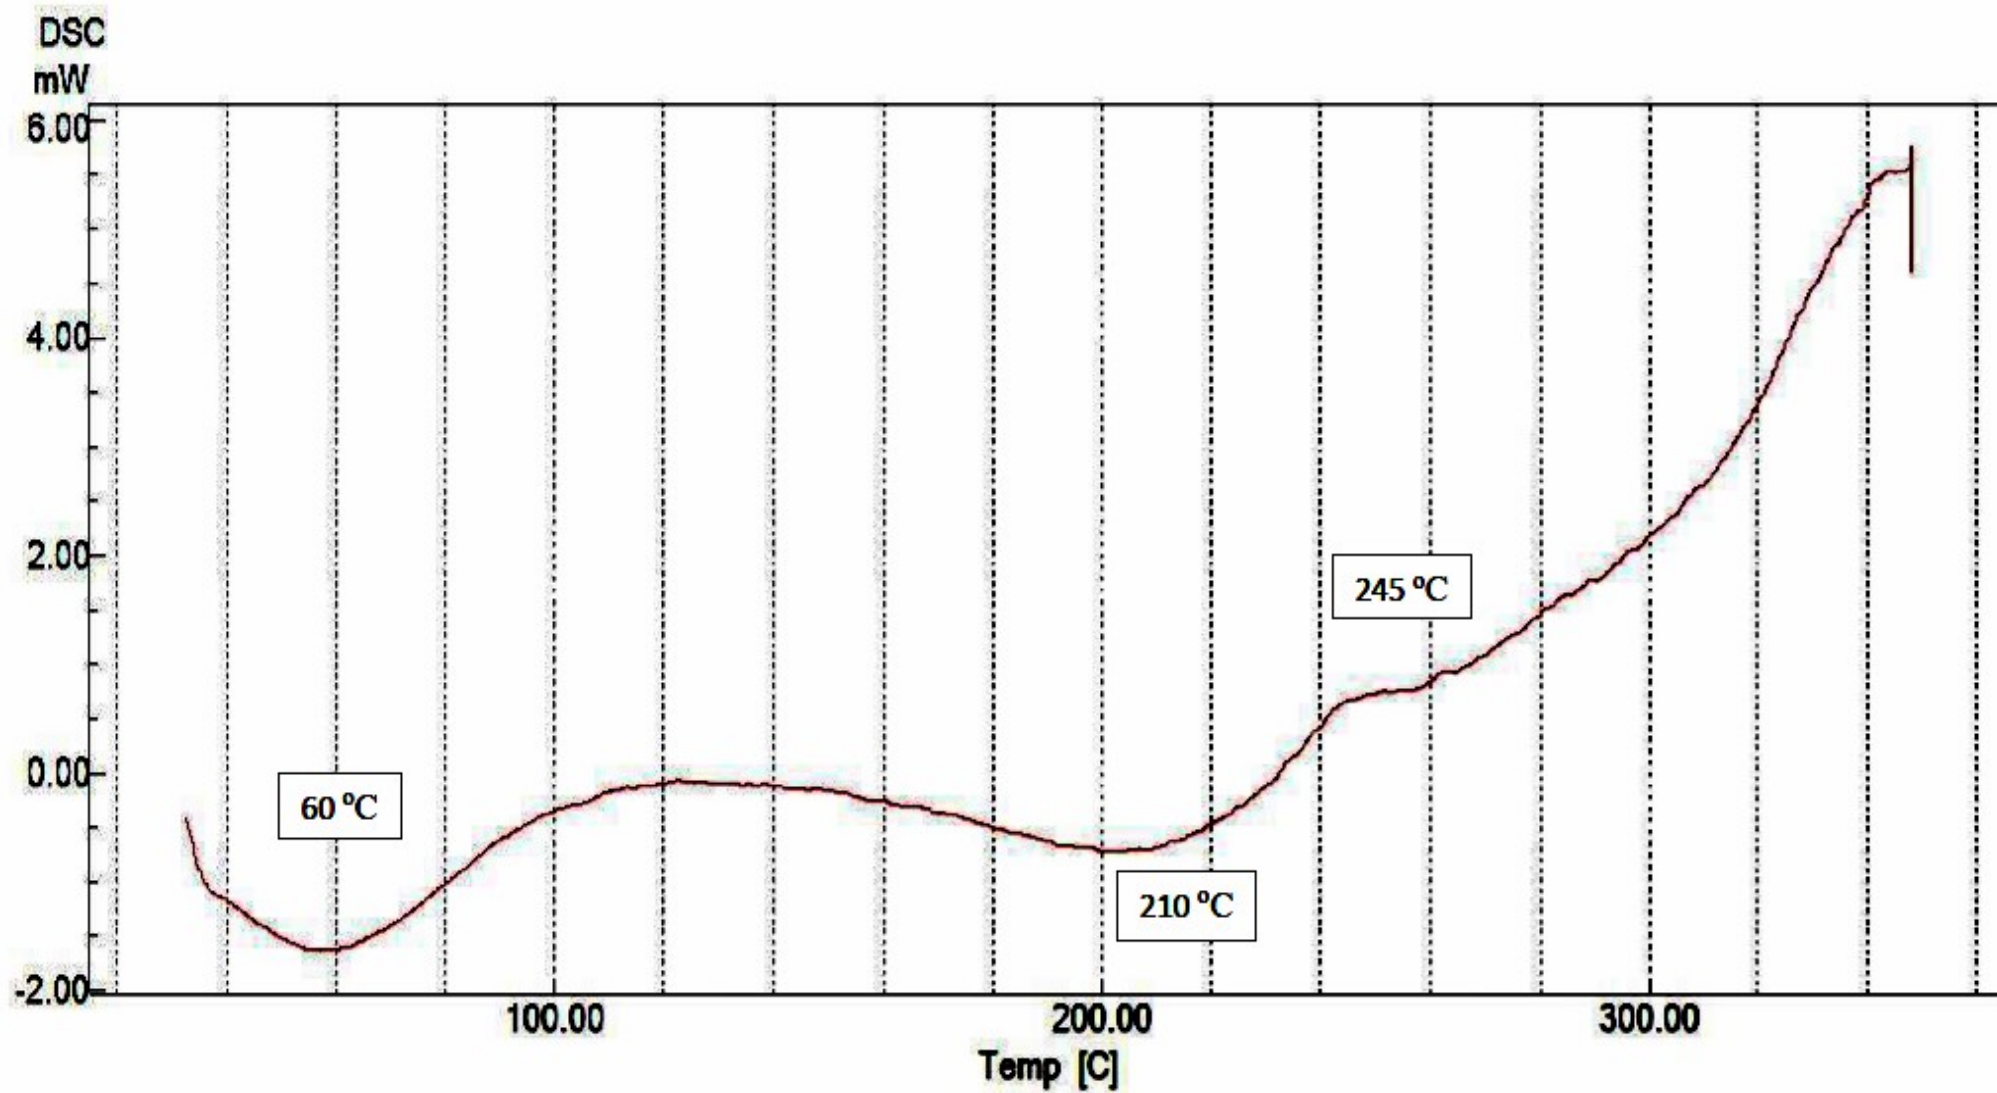

Figure S4: DSC of Chitosan Phthalate (CP)

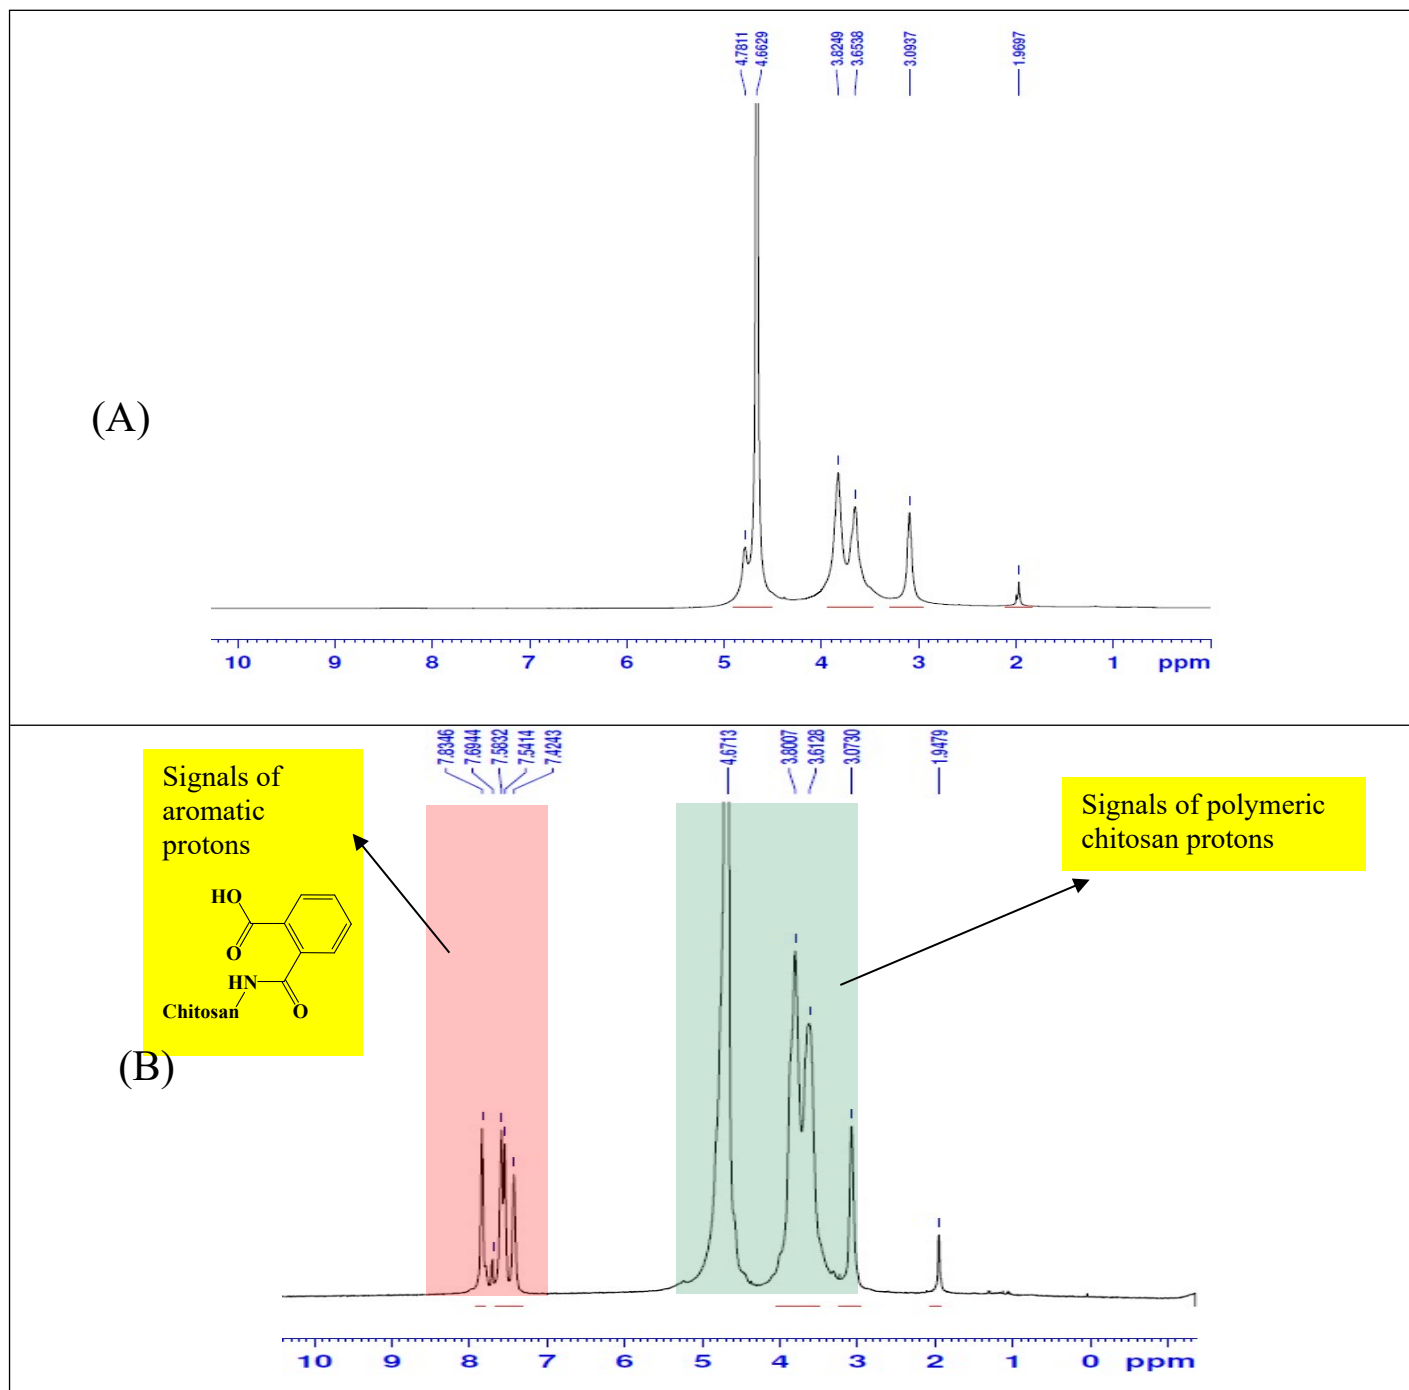

**Figure S5**  $^1\text{H}$  NMR spectrums of (A) chitosan, (B) chitosan phthalate.
